# Supplementary material for: Potential Clinical Impact of LAFOV PET/CT: A Systematic Evaluation of Image Quality and Lesion Detection
Source: MDPI journal article supplement (doi:10.3390/diagnostics13213295), 2023-10-24
Supplement: s1 [file s1]

## Supplementary materials

**Table S1: Referral texts**

List of provided referral texts for the patients otherwise blinded during lesion detection

|                                     |                                     |                                |
|-------------------------------------|-------------------------------------|--------------------------------|
| 1; T.C. Cervical cancer             | 35; P.D. Ovarian cancer             | 69; R. Hodgkins lymphoma       |
| 2; T.C. Cervical cancer             | 36; P.D. Ovarian cancer             | 70; R. Hodgkins lymphoma       |
| 3; T.C. Cervical cancer             | 37; P.D. Ovarian cancer             | 71; R. Hodgkins lymphoma       |
| 4; T.C. Cervical cancer             | 38; P.D. Ovarian cancer             | 72; R. Lymphoma                |
| 5; T.C. Cervical cancer             | 39; P.D. Ovarian cancer             | 73; R. Lymphoma                |
| 6; T.C. Esophageal cancer           | 40; P.D. Lung cancer                | 74; R. Lymphoma                |
| 7; T.C. Hepatic cancer              | 41; P.D. Vulvar cancer              | 75; R. Lymphoma                |
| 8; T.C. Disseminated breast cancer  | 42; P.D. Lymphoma                   | 76; R. Melanoma                |
| 9; T.C. Pancreatic cancer           | 43; P.D. Lymphoma                   | 77; R. Melanoma                |
| 10; T.C. Lung cancer (mesothelioma) | 44; P.D. Sacral tumor               | 78; R. Melanoma                |
| 11; T.C. Bladder cancer             | 45; P.D. Occult primary tumor       | 79; R. Melanoma                |
| 12; T.C. Vulvar cancer              | 46; P.D. Ovarian cancer             | 80; R. Peritoneal mesothelioma |
| 13; T.C. Vulvar cancer              | 47; P.D. Vulvar cancer              | 81; R. Myeloma                 |
| 14; T.C. Hepatocellular carcinoma   | 48; P.D. Occult primary tumor       | 82; R. Lung cancer (NSCLC)     |
| 15; T.C. Melanoma                   | 49; P.D. Melanoma                   | 83; R. Lymphoma (PMBCL)        |
| 16; T.C. Melanoma                   | 50; R. Cervical cancer              | 84; S. Cardiac cancer          |
| 17; T.C. Lung cancer (NSCLC)        | 51; R. Cervical cancer              | 85; S. Cervical cancer         |
| 18; T.C. Lung cancer (NSCLC)        | 52; R. Cervical cancer              | 86; S. Cervical cancer         |
| 19; T.C. Lung cancer (mesothelioma) | 53; R. Cervical cancer              | 87; S. Cervical cancer         |
| 20; P.D. Breast cancer              | 54; R. Cervical cancer              | 88; S. Cervical cancer         |
| 21; P.D. Ovarian cancer             | 55; R. Colon cancer / Breast cancer | 89; S. Cervical cancer         |
| 22; P.D. Cervical cancer            | 56; R. Hepatic cancer               | 90; S. Uterine cancer          |
| 23; P.D. Uterine cancer             | 57; R. Breast cancer                | 91; S. Breast cancer           |
| 24; P.D. Uterine cancer             | 58; R. Breast cancer                | 92; S. Breast cancer           |
| 25; P.D. Uterine cancer             | 59; R. Breast cancer                | 93; S. Breast cancer           |
| 26; P.D. Uterine cancer             | 60; R. Breast cancer                | 94; S. Breast cancer           |
| 27; P.D. Breast cancer              | 61; R. Ovarian cancer               | 95; S. Breast cancer           |
| 28; P.D. Breast cancer              | 62; R. Ovarian cancer               | 96; S. Breast cancer           |
| 29; P.D. Breast cancer              | 63; R. Ovarian cancer               | 97; S. Breast cancer           |
| 30; P.D. Esophageal cancer          | 64; R. Pancreatic cancer            | 98; S. Penile cancer           |
| 31; P.D. Occult primary tumor       | 65; R. Urinary cancer               | 99; S. Fallopian tube cancer   |
| 32; P.D. Ovarian cancer             | 66; R. Vaginal cancer               | 100; S. Vulvar cancer          |
| 33; P.D. Ovarian cancer             | 67; R. Vulvar cancer                |                                |
| 34; P.D. Ovarian cancer             | 68; R. Chronic lymphocytic leukemia |                                |

*T.C: Treatment control, P.D: Primary diagnostics, R: Rrecurrence, S:Staging*

**Table S2: Pre-defined lists of organ sites, lymph nodes and anatomical regions**

| <b>Organ</b>                      |
|-----------------------------------|
| 1. Brain                          |
| 2. Oro/naso/hypopharynx/larynx    |
| 3. Thyroid                        |
| 4. Lung, right                    |
| 5. Lung, left                     |
| 6. Pleura, right                  |
| 7. Pleura, left                   |
| 8. Breast, right                  |
| 9. Breast, left                   |
| 10. Oesophagus                    |
| 11. Liver                         |
| 12. Pancreas                      |
| 13. Adrenal, right                |
| 14. Adrenal, left                 |
| 15. Kidney, right                 |
| 16. Kidney, left                  |
| 17. Spleen                        |
| 18. Stomach                       |
| 19. Bowel                         |
| 20. Peritoneal                    |
| 21. Ovary, right                  |
| 22. Ovary, left                   |
| 23. Uterus                        |
| 24. Cervix                        |
| 25. Vagina/vulva                  |
| 26. Prostate                      |
| 27. Penis/scrotum                 |
| 28. Bones                         |
| 29. Cutis                         |
| 30. Other                         |
| <b>Lymphnodes</b>                 |
| 31. Head/neck, right              |
| 32. Head/neck, left               |
| 33. Axilla/subpect, right         |
| 34. Axilla/subpect, left          |
| 35. Mediastinum/hilar/retrocrural |
| 36. Int mam, precardiac           |
| 37. Retroperitoneal               |
| 38. Abdominal                     |
| 39. Iliac, right                  |
| 40. Iliac, left                   |
| 41. Groin, right                  |
| 42. Groin, left                   |
| 43. Lnn, other                    |

|                               |                               |
|-------------------------------|-------------------------------|
| <b>Ear Nose Throat region</b> |                               |
| Organ                         |                               |
| 2.                            | Oro/naso/hypopharynx/larynx   |
| 3.                            | Thyroid                       |
| Lymph nodes                   |                               |
| 31.                           | Head/neck, right              |
| 32.                           | Head/neck, left               |
| <b>Thoracic region</b>        |                               |
| Organ                         |                               |
| 4.                            | Lung, right                   |
| 5.                            | Lung, left                    |
| 6.                            | Pleura, right                 |
| 7.                            | Pleura, left                  |
| 10.                           | Esophagus                     |
| Lymph nodes                   |                               |
| 35.                           | Mediastinum/hilar/retrocrural |
| <b>Abdominal</b>              |                               |
| Organ                         |                               |
| 11.                           | Liver                         |
| 12.                           | Pancreas                      |
| 13.                           | Adrenal, right                |
| 14.                           | Adrenal, left                 |
| 15.                           | Kidney, right                 |
| 16.                           | Kidney, left                  |
| 17.                           | Spleen                        |
| 18.                           | Stomach                       |
| 19.                           | Bowel                         |
| 20.                           | Peritoneal                    |
| Lymph nodes                   |                               |
| 37.                           | Retroperitoneal               |
| 38.                           | Abdominal                     |
| <b>Pelvic region</b>          |                               |
| Organ                         |                               |
| 21.                           | Ovary, right                  |
| 22.                           | Ovary, left                   |
| 23.                           | Uterus                        |
| 24.                           | Cervix                        |
| 25.                           | Vagina/vulva                  |
| 26.                           | Prostate                      |
| 27.                           | Penis/scrotum                 |
| Lymph nodes                   |                               |
| 39.                           | Iliac, right                  |
| 40.                           | Iliac, left                   |

**Figure S1: Total image findings**

| Patient                       | 30 sek                                 |     |    |     | 90 sek                                 |     |    |     | 180 sek                                |     |    |     | 300 sek                                |     |    |     | 600 sek                                |     |    |     |
|-------------------------------|----------------------------------------|-----|----|-----|----------------------------------------|-----|----|-----|----------------------------------------|-----|----|-----|----------------------------------------|-----|----|-----|----------------------------------------|-----|----|-----|
| Organ                         | Count (0: Benign* ( Equivocal Malignan |     |    |     | Count (0: Benign* ( Equivocal Malignan |     |    |     | Count (0: Benign* ( Equivocal Malignan |     |    |     | Count (0: Benign* ( Equivocal Malignan |     |    |     | Count (0: Benign* ( Equivocal Malignan |     |    |     |
| Brain                         | 1                                      | 1   | 0  | 0   | 1                                      | 1   | 0  | 0   | 1                                      | 1   | 0  | 0   | 1                                      | 1   | 0  | 0   | 1                                      | 1   | 0  | 0   |
| Oro/naso/hypopharynx/larynx   | 17                                     | 15  | 0  | 2   | 23                                     | 20  | 1  | 2   | 24                                     | 21  | 1  | 2   | 23                                     | 20  | 1  | 2   | 23                                     | 20  | 1  | 2   |
| Thyroid                       | 15                                     | 6   | 8  | 1   | 16                                     | 8   | 7  | 1   | 17                                     | 10  | 6  | 1   | 17                                     | 10  | 6  | 1   | 17                                     | 10  | 6  | 1   |
| Lung, right                   | 23                                     | 12  | 3  | 8   | 25                                     | 13  | 3  | 9   | 25                                     | 14  | 1  | 10  | 23                                     | 13  | 1  | 9   | 23                                     | 12  | 2  | 9   |
| Lung, left                    | 16                                     | 6   | 4  | 6   | 18                                     | 9   | 3  | 6   | 18                                     | 9   | 3  | 6   | 18                                     | 9   | 3  | 6   | 18                                     | 9   | 3  | 6   |
| Pleura, right                 | 13                                     | 1   | 5  | 7   | 15                                     | 2   | 6  | 7   | 15                                     | 2   | 6  | 7   | 15                                     | 2   | 6  | 7   | 15                                     | 2   | 6  | 7   |
| Pleura, left                  | 9                                      | 1   | 0  | 8   | 9                                      | 1   | 1  | 7   | 9                                      | 1   | 1  | 7   | 9                                      | 1   | 1  | 7   | 9                                      | 1   | 1  | 7   |
| Breast, right                 | 17                                     | 1   | 3  | 13  | 16                                     | 1   | 1  | 14  | 16                                     | 1   | 1  | 14  | 17                                     | 1   | 2  | 14  | 18                                     | 1   | 3  | 14  |
| Breast, left                  | 15                                     | 1   | 4  | 10  | 17                                     | 1   | 6  | 10  | 17                                     | 1   | 6  | 10  | 17                                     | 3   | 4  | 10  | 17                                     | 3   | 4  | 10  |
| Oesophagus                    | 8                                      | 3   | 4  | 1   | 9                                      | 6   | 2  | 1   | 10                                     | 7   | 2  | 1   | 10                                     | 7   | 2  | 1   | 10                                     | 7   | 2  | 1   |
| Liver                         | 18                                     | 1   | 5  | 12  | 18                                     | 0   | 4  | 14  | 17                                     | 1   | 0  | 16  | 19                                     | 1   | 2  | 16  | 21                                     | 2   | 3  | 16  |
| Pancreas                      | 2                                      | 0   | 0  | 2   | 2                                      | 0   | 0  | 2   | 2                                      | 0   | 0  | 2   | 2                                      | 0   | 0  | 2   | 2                                      | 0   | 0  | 2   |
| Adrenal, right                | 2                                      | 1   | 0  | 1   | 2                                      | 1   | 0  | 1   | 2                                      | 1   | 0  | 1   | 2                                      | 1   | 0  | 1   | 2                                      | 1   | 0  | 1   |
| Adrenal, left                 | 2                                      | 2   | 0  | 0   | 3                                      | 3   | 0  | 0   | 4                                      | 4   | 0  | 0   | 2                                      | 2   | 0  | 0   | 2                                      | 2   | 0  | 0   |
| Kidney, right                 | 0                                      | 0   | 0  | 0   | 0                                      | 0   | 0  | 0   | 0                                      | 0   | 0  | 0   | 0                                      | 0   | 0  | 0   | 0                                      | 0   | 0  | 0   |
| Kidney, left                  | 0                                      | 0   | 0  | 0   | 0                                      | 0   | 0  | 0   | 0                                      | 0   | 0  | 0   | 0                                      | 0   | 0  | 0   | 0                                      | 0   | 0  | 0   |
| Spleen                        | 2                                      | 0   | 0  | 2   | 2                                      | 0   | 0  | 2   | 6                                      | 0   | 0  | 6   | 6                                      | 0   | 0  | 6   | 6                                      | 0   | 0  | 6   |
| Stomach                       | 3                                      | 1   | 1  | 1   | 6                                      | 3   | 2  | 1   | 6                                      | 3   | 2  | 1   | 6                                      | 4   | 1  | 1   | 6                                      | 4   | 1  | 1   |
| Bowel                         | 40                                     | 23  | 12 | 5   | 45                                     | 33  | 7  | 5   | 45                                     | 33  | 7  | 5   | 47                                     | 35  | 7  | 5   | 47                                     | 35  | 7  | 5   |
| Peritoneal                    | 26                                     | 1   | 2  | 23  | 26                                     | 1   | 2  | 23  | 29                                     | 3   | 1  | 25  | 28                                     | 4   | 0  | 24  | 29                                     | 4   | 0  | 25  |
| Ovary, right                  | 11                                     | 6   | 3  | 2   | 11                                     | 7   | 2  | 2   | 11                                     | 7   | 2  | 2   | 11                                     | 8   | 1  | 2   | 11                                     | 8   | 1  | 2   |
| Ovary, left                   | 11                                     | 8   | 3  | 0   | 11                                     | 9   | 2  | 0   | 11                                     | 9   | 2  | 0   | 11                                     | 9   | 2  | 0   | 11                                     | 9   | 2  | 0   |
| Uterus                        | 10                                     | 3   | 1  | 6   | 9                                      | 2   | 1  | 6   | 10                                     | 3   | 1  | 6   | 10                                     | 3   | 1  | 6   | 10                                     | 3   | 1  | 6   |
| Cervix                        | 10                                     | 2   | 1  | 7   | 12                                     | 3   | 2  | 7   | 12                                     | 3   | 2  | 7   | 12                                     | 3   | 2  | 7   | 11                                     | 2   | 2  | 7   |
| Vagina/vulva                  | 8                                      | 4   | 2  | 2   | 9                                      | 4   | 3  | 2   | 9                                      | 5   | 1  | 3   | 9                                      | 5   | 1  | 3   | 8                                      | 4   | 1  | 3   |
| Prostate                      | 3                                      | 1   | 2  | 0   | 3                                      | 1   | 1  | 1   | 5                                      | 2   | 2  | 1   | 5                                      | 3   | 1  | 1   | 5                                      | 3   | 1  | 1   |
| Penis/scrotum                 | 2                                      | 2   | 0  | 0   | 2                                      | 2   | 0  | 0   | 4                                      | 4   | 0  | 0   | 5                                      | 5   | 0  | 0   | 5                                      | 5   | 0  | 0   |
| Bones                         | 52                                     | 21  | 6  | 25  | 60                                     | 32  | 2  | 26  | 61                                     | 33  | 2  | 26  | 63                                     | 37  | 2  | 24  | 63                                     | 37  | 2  | 24  |
| Cutis                         | 22                                     | 16  | 1  | 5   | 23                                     | 16  | 2  | 5   | 24                                     | 17  | 2  | 5   | 24                                     | 18  | 1  | 5   | 23                                     | 17  | 1  | 5   |
| Other                         | 94                                     | 78  | 5  | 11  | 102                                    | 85  | 4  | 13  | 103                                    | 85  | 1  | 17  | 104                                    | 85  | 2  | 17  | 103                                    | 85  | 2  | 16  |
| Total, organs                 | 452                                    | 217 | 75 | 160 | 495                                    | 264 | 64 | 167 | 513                                    | 280 | 52 | 181 | 516                                    | 290 | 49 | 177 | 516                                    | 287 | 52 | 177 |
| Lymphnodes                    | Count (0: Benign* ( Equivocal Malignan |     |    |     | Count (0: Benign* ( Equivocal Malignan |     |    |     | Count (0: Benign* ( Equivocal Malignan |     |    |     | Count (0: Benign* ( Equivocal Malignan |     |    |     | Count (0: Benign* ( Equivocal Malignan |     |    |     |
| Head/neck, right              | 34                                     | 24  | 0  | 10  | 35                                     | 25  | 0  | 10  | 42                                     | 31  | 1  | 10  | 48                                     | 37  | 1  | 10  | 49                                     | 39  | 0  | 10  |
| Head/neck, left               | 55                                     | 33  | 6  | 16  | 57                                     | 32  | 5  | 20  | 68                                     | 44  | 4  | 20  | 72                                     | 48  | 4  | 20  | 73                                     | 52  | 1  | 20  |
| Axilla/subpect, right         | 59                                     | 26  | 12 | 21  | 71                                     | 35  | 10 | 26  | 80                                     | 43  | 8  | 29  | 90                                     | 53  | 7  | 30  | 91                                     | 54  | 7  | 30  |
| Axilla/subpect, left          | 76                                     | 36  | 14 | 26  | 89                                     | 60  | 2  | 27  | 97                                     | 68  | 2  | 27  | 102                                    | 74  | 1  | 27  | 107                                    | 80  | 0  | 27  |
| Mediastinum/hilar/retrocrural | 42                                     | 4   | 8  | 30  | 51                                     | 16  | 2  | 33  | 56                                     | 21  | 1  | 34  | 59                                     | 23  | 2  | 34  | 62                                     | 26  | 1  | 35  |
| Int mam, precardiac           | 13                                     | 0   | 1  | 12  | 18                                     | 0   | 2  | 16  | 20                                     | 1   | 0  | 19  | 21                                     | 1   | 1  | 19  | 21                                     | 1   | 0  | 20  |
| Retroperitoneal               | 40                                     | 3   | 7  | 30  | 42                                     | 4   | 7  | 31  | 43                                     | 4   | 7  | 32  | 43                                     | 4   | 7  | 32  | 43                                     | 3   | 7  | 33  |
| Abdominal                     | 17                                     | 1   | 0  | 16  | 17                                     | 1   | 0  | 16  | 20                                     | 1   | 1  | 18  | 22                                     | 4   | 0  | 18  | 19                                     | 1   | 0  | 18  |
| Iliac, right                  | 29                                     | 0   | 5  | 24  | 32                                     | 5   | 2  | 25  | 35                                     | 7   | 2  | 26  | 37                                     | 9   | 2  | 26  | 37                                     | 10  | 2  | 25  |
| Iliac, left                   | 28                                     | 1   | 3  | 24  | 30                                     | 3   | 2  | 25  | 32                                     | 5   | 1  | 26  | 34                                     | 8   | 0  | 26  | 36                                     | 7   | 4  | 25  |
| Groin, right                  | 24                                     | 6   | 4  | 14  | 26                                     | 9   | 3  | 14  | 35                                     | 20  | 1  | 14  | 47                                     | 32  | 1  | 14  | 47                                     | 32  | 1  | 14  |
| Groin, left                   | 21                                     | 7   | 3  | 11  | 26                                     | 11  | 4  | 11  | 35                                     | 20  | 4  | 11  | 46                                     | 32  | 3  | 11  | 45                                     | 31  | 3  | 11  |
| Lnn, other                    | 22                                     | 2   | 2  | 18  | 23                                     | 2   | 2  | 19  | 23                                     | 2   | 2  | 19  | 23                                     | 2   | 2  | 19  | 25                                     | 2   | 2  | 21  |
| Total, nodes                  | 460                                    | 143 | 65 | 252 | 517                                    | 203 | 41 | 273 | 586                                    | 267 | 34 | 285 | 644                                    | 327 | 31 | 286 | 655                                    | 338 | 28 | 289 |
